# Supplementary material
Source: PubMed Central journal article supplement (PMC7007773)
Supplement: NIHMS1068203-supplement-Supplemental_Materials_Online.pdf [file NIHMS1068203-supplement-Supplemental_Materials_Online.pdf]

# **Journal of Health and Social Behavior**

OFFICIAL JOURNAL OF THE AMERICAN SOCIOLOGICAL ASSOCIATION

**ONLINE SUPPLEMENT**

**to article in**

Journal of Health and Social Behavior, 2019, Vol. 60, Issue 4

**School Context in Adolescence and Cognitive Functioning 50 Years Later**

**Sara M. Moorman**

*Boston College*

**Emily A. Greenfield**

*Rutgers, The State University of New Jersey*

**Sarah Garcia**

*University of Minnesota*

Table OSM-1. *Main Manuscript Table 3, Unabridged*

|                                                    | Memory          |                  |                    |                    | Language/Executive Function |                   |                   |                   |
|----------------------------------------------------|-----------------|------------------|--------------------|--------------------|-----------------------------|-------------------|-------------------|-------------------|
|                                                    | Model 1         | Model 2          | Model 3            | Model 4            | Model 1                     | Model 2           | Model 3           | Model 4           |
|                                                    | <i>B (SE)</i>   | <i>B (SE)</i>    | <i>B (SE)</i>      | <i>B (SE)</i>      | <i>B (SE)</i>               | <i>B (SE)</i>     | <i>B (SE)</i>     | <i>B (SE)</i>     |
| <i>Secondary School Context</i>                    |                 |                  |                    |                    |                             |                   |                   |                   |
| School advantage (effect on baseline)              | -0.03<br>(0.35) | -0.13<br>(0.35)  | -0.15<br>(0.34)    | -0.15<br>(0.34)    | 0.67**<br>(0.27)            | 0.51<br>(0.26)    | 0.46<br>(0.25)    | 0.46<br>(0.25)    |
| School advantage (effect on change)                | 0.77<br>(0.40)  | 0.84<br>(0.40)   | 0.85*<br>(0.40)    | 0.85*<br>(0.39)    | -0.01<br>(0.26)             | 0.01<br>(0.26)    | 0.03<br>(0.26)    | 0.03<br>(0.26)    |
| <i>Socioeconomic Status</i>                        |                 |                  |                    |                    |                             |                   |                   |                   |
| Parental (baseline)                                |                 | 0.92**<br>(0.29) | 0.50<br>(0.29)     | 0.50<br>(0.29)     |                             | 1.33***<br>(0.22) | 0.78***<br>(0.22) | 0.78***<br>(0.22) |
| Parental (change)                                  |                 | -0.69*<br>(0.34) | -0.41<br>(0.34)    | -0.41<br>(0.34)    |                             | -0.09<br>(0.22)   | -0.12<br>(0.22)   | -0.12<br>(0.22)   |
| Midlife (baseline)                                 |                 |                  | 2.41***<br>(0.31)  | 2.41***<br>(0.31)  |                             |                   | 2.93***<br>(0.23) | 2.93***<br>(0.23) |
| Midlife (change)                                   |                 |                  | -1.63***<br>(0.37) | -1.62***<br>(0.37) |                             |                   | 0.15<br>(0.24)    | 0.15<br>(0.24)    |
| <i>Interaction Terms</i>                           |                 |                  |                    |                    |                             |                   |                   |                   |
| Secondary school advantage x class rank (baseline) |                 |                  |                    | -0.02<br>(0.21)    |                             |                   |                   | -0.48**<br>(0.16) |

Table OSM-1 *cont'd*

|                                                     | Memory             |                    |                    |                    | Language/Executive Function |                   |                   |                   |
|-----------------------------------------------------|--------------------|--------------------|--------------------|--------------------|-----------------------------|-------------------|-------------------|-------------------|
|                                                     | Model 1            | Model 2            | Model 3            | Model 4            | Model 1                     | Model 2           | Model 3           | Model 4           |
|                                                     | <i>B (SE)</i>               | <i>B (SE)</i>     | <i>B (SE)</i>     | <i>B (SE)</i>     |
| Secondary school advantage x<br>class rank (change) |                    |                    |                    | -0.05<br>(0.25)    |                             |                   |                   | 0.27<br>(0.16)    |
| <i>Covariates</i>                                   |                    |                    |                    |                    |                             |                   |                   |                   |
| Class rank (baseline)                               | 2.54***<br>(0.32)  | 2.41***<br>(0.32)  | 1.59***<br>(0.35)  | 1.61***<br>(0.40)  | 4.04***<br>(0.22)           | 3.81***<br>(0.22) | 2.65***<br>(0.24) | 3.10***<br>(0.28) |
| Class rank (change)                                 | -0.31<br>(0.37)    | -0.22<br>(0.37)    | 0.31<br>(0.39)     | 0.35<br>(0.45)     | -0.13<br>(0.24)             | -0.11<br>(0.24)   | -0.18<br>(0.26)   | -0.44<br>(0.30)   |
| Polygenic score for cognitive<br>ability (baseline) | 0.26<br>(0.27)     | 0.25<br>(0.27)     | 0.15<br>(0.27)     | 0.15<br>(0.27)     | 1.41***<br>(0.21)           | 1.40***<br>(0.21) | 1.21***<br>(0.20) | 1.21***<br>(0.20) |
| Polygenic score for cognitive<br>ability (change)   | 0.74*<br>(0.32)    | 0.75*<br>(0.32)    | 0.83*<br>(0.32)    | 0.83*<br>(0.32)    | -0.19<br>(0.21)             | -0.18<br>(0.21)   | -0.17<br>(0.21)   | -0.18<br>(0.21)   |
| Language (baseline)                                 | 0.17***<br>(0.02)  | 0.16***<br>(0.02)  | 0.12***<br>(0.02)  | 0.12***<br>(0.02)  |                             |                   |                   |                   |
| Language (change)                                   | 0.11***<br>(0.03)  | 0.12***<br>(0.03)  | 0.16***<br>(0.03)  | 0.16***<br>(0.03)  |                             |                   |                   |                   |
| Memory (baseline)                                   |                    |                    |                    |                    | 0.07***<br>(0.01)           | 0.06***<br>(0.01) | 0.05***<br>(0.01) | 0.05***<br>(0.01) |
| Memory (change)                                     |                    |                    |                    |                    | 0.10***<br>(0.02)           | 0.10***<br>(0.02) | 0.10***<br>(0.02) | 0.10***<br>(0.02) |
| Gender (baseline)                                   | 6.69***<br>(0.53)  | 6.77***<br>(0.53)  | 8.00***<br>(0.56)  | 8.00***<br>(0.56)  | -0.19<br>(0.42)             | -0.06<br>(0.42)   | 1.50***<br>(0.43) | 1.48**<br>(0.43)  |
| Gender (change)                                     | -3.17***<br>(0.64) | -3.23***<br>(0.64) | -4.06***<br>(0.67) | -4.06***<br>(0.67) | -0.70<br>(0.43)             | -0.72<br>(0.43)   | -0.66<br>(0.45)   | -0.65<br>(0.45)   |
| Adolescent geographic setting<br>(baseline)         | -1.09<br>(0.87)    | -0.87<br>(0.88)    | -0.59<br>(0.86)    | -0.58<br>(0.86)    | -0.64<br>(0.68)             | -0.35<br>(0.66)   | -0.10<br>(0.62)   | -0.01<br>(0.63)   |

| Table OSM-1 <i>cont'd</i>              | Memory             |                    |                     |                     | Language/Executive Function |                    |                    |                    |
|----------------------------------------|--------------------|--------------------|---------------------|---------------------|-----------------------------|--------------------|--------------------|--------------------|
|                                        | Model 1            | Model 2            | Model 3             | Model 4             | Model 1                     | Model 2            | Model 3            | Model 4            |
|                                        | <i>B (SE)</i>      | <i>B (SE)</i>      | <i>B (SE)</i>       | <i>B (SE)</i>       | <i>B (SE)</i>               | <i>B (SE)</i>      | <i>B (SE)</i>      | <i>B (SE)</i>      |
| Adolescent geographic setting (change) | 0.94<br>(0.99)     | 0.78<br>(0.99)     | 0.60<br>(1.00)      | 0.60<br>(0.99)      | 0.17<br>(0.65)              | 0.15<br>(0.66)     | 0.24<br>(0.65)     | 0.24<br>(0.66)     |
| Adolescent family structure (baseline) | -1.71<br>(0.89)    | -1.46<br>(0.89)    | -1.54<br>(0.88)     | -1.55<br>(0.89)     | -0.01<br>(0.69)             | 0.35<br>(0.69)     | 0.22<br>(0.67)     | 0.25<br>(0.67)     |
| Adolescent family structure (change)   | 1.52<br>(1.07)     | 1.33<br>(1.07)     | 1.39<br>(1.07)      | 1.39<br>(1.07)      | -0.13<br>(0.70)             | -0.15<br>(0.71)    | -0.13<br>(0.71)    | -0.15<br>(0.71)    |
| Number of siblings (baseline)          | -0.11<br>(0.12)    | -0.04<br>(0.12)    | 0.03<br>(0.12)      | 0.03<br>(0.12)      | -0.17<br>(0.09)             | -0.06<br>(0.09)    | 0.02<br>(0.09)     | 0.03<br>(0.09)     |
| Number of siblings (change)            | 0.09<br>(0.14)     | 0.04<br>(0.14)     | -0.00<br>(0.14)     | -0.00<br>(0.14)     | -0.02<br>(0.09)             | -0.03<br>(0.10)    | -0.03<br>(0.10)    | -0.03<br>(0.10)    |
| Age (65/72)                            | -10.0***<br>(1.70) | -10.1***<br>(1.70) | -11.03***<br>(1.70) | -11.02***<br>(1.70) | -6.31***<br>(1.05)          | -6.35***<br>(1.05) | -6.56***<br>(1.04) | -6.57***<br>(1.04) |
| <i>Random Components</i>               |                    |                    |                     |                     |                             |                    |                    |                    |
| School-level intercept                 | 1.11<br>(0.62)     | 1.17<br>(0.59)     | 0.98<br>(0.67)      | 0.97<br>(0.67)      | 0.85<br>(0.48)              | 0.51<br>(0.63)     | 0.00<br>(0.00)     | 0.00<br>(0.00)     |
| Person-level intercept                 | 7.80<br>(0.26)     | 7.79<br>(0.26)     | 7.76<br>(0.26)      | 7.76<br>(0.26)      | 7.71<br>(0.17)              | 7.66<br>(0.17)     | 7.27<br>(0.16)     | 7.26<br>(0.16)     |
| Observation-level intercept            | 11.51<br>(0.16)    | 11.50<br>(0.16)    | 11.45<br>(0.16)     | 11.45<br>(0.16)     | 7.54<br>(0.10)              | 7.54<br>(0.10)     | 7.53<br>(0.10)     | 7.52<br>(0.10)     |
| Deviance; <i>df</i>                    | 46,504;<br>22      | 46,494;<br>24      | 46,432;<br>26       | 46,432;<br>28       | 43,007;<br>22               | 42,964;<br>24      | 42,745;<br>26      | 42,736;<br>28      |

*Note.* All models adjust for five principal components of population stratification by ancestry. All predictors are standardized. Memory and language/executive function are presented as percentage of maximum possible. \*\*\*  $p < .001$ , \*\*  $p < .01$ , \*  $p < .05$

Table OSM-2. Comparison of Members of the Analytic Sample against Members of Excluded Subgroups

|                                                   | Analytic sample       | Private school students | Attrited before age 65 | Refused genetic testing | Incomplete cognitive testing |
|---------------------------------------------------|-----------------------|-------------------------|------------------------|-------------------------|------------------------------|
|                                                   | Mean (SD)             | Mean (SD)               | Mean (SD)              | Mean (SD)               | Mean (SD)                    |
| <i>Adult Cognition</i>                            |                       |                         |                        |                         |                              |
| Memory (age 65)                                   | 0.54<br>(0.17)        | 0.57<br>(0.17)          | NA                     | 0.54<br>(0.18)          | NA                           |
| Memory (age 72)                                   | 0.48<br>(0.13)        | 0.50<br>(0.14)          | NA                     | 0.48<br>(0.14)          | NA                           |
| Language/executive function (age 65)              | 0.47<br>(0.12)        | 0.49<br>(0.14)          | NA                     | 0.45<br>(0.15)          | NA                           |
| Language/executive function (age 72)              | 0.44<br>(0.12)        | 0.45<br>(0.12)          | NA                     | 0.43<br>(0.14)          | NA                           |
| <i>Secondary School Context</i>                   |                       |                         |                        |                         |                              |
| School advantage (standardized across schools)    | 0.94<br>(1.24)        | NA                      | 1.00<br>(1.23)         | 0.95<br>(1.22)          | 0.95<br>(1.23)               |
| <i>Academic Achievement and Cognitive Ability</i> |                       |                         |                        |                         |                              |
| High school rank (percentile)                     | 54.62<br>(28.14)      | 49.43<br>(29.15)        | 43.57<br>(28.51)       | 49.61<br>(28.68)        | 53.84<br>(28.34)             |
| Polygenic score for cognitive ability             | -0.34<br>(0.22)       | -0.32<br>(0.23)         | NA                     | NA                      | -0.35<br>(0.22)              |
| <i>Socioeconomic Status</i>                       |                       |                         |                        |                         |                              |
| Mother's education (years)                        | 10.65<br>(2.96)       | 10.76<br>(2.98)         | 10.46<br>(2.82)        | 10.58<br>(2.90)         | 10.78<br>(2.94)              |
| Father's education (years)                        | 10.30<br>(3.08)       | 10.75<br>(3.30)         | 10.08<br>(3.01)        | 10.16<br>(3.14)         | 10.33<br>(3.20)              |
| Father's 1950 Duncan SEI                          | 29.56<br>(22.05)      | 35.11<br>(23.50)        | 28.40<br>(20.78)       | 30.10<br>(21.49)        | 30.18<br>(22.67)             |
| Family income <sup>a</sup> (dollars)              | 5,400<br>(300-99,800) | 6,100<br>(0-99,800)     | 5,100<br>(100-74,600)  | 6,173<br>(100-99,800)   | 5,300<br>(200-99,800)        |
| Own education (years)                             | 13.74<br>(2.34)       | 13.93<br>(2.41)         | 13.12<br>(1.98)        | 13.34<br>(2.12)         | 13.64<br>(2.24)              |
| Percentage of workers in own field with a BA      | 49.2<br>(22.7)        | 50.6<br>(22.4)          | 43.7<br>(23.0)         | 46.5<br>(22.7)          | 48.3<br>(22.8)               |

| Table OSM-2 <i>cont'd</i>                                               | Analytic sample                | Private school students        | Attrited before age 65        | Refused genetic testing        | Incomplete cognitive testing |
|-------------------------------------------------------------------------|--------------------------------|--------------------------------|-------------------------------|--------------------------------|------------------------------|
|                                                                         | Mean (SD)                      | Mean (SD)                      | Mean (SD)                     | Mean (SD)                      | Mean (SD)                    |
| Own income at age 53 <sup>a</sup> (dollars)                             | 56,650<br>-14,400<br>5,939,814 | 53,300<br>-12,000<br>1,029,120 | 39,050<br>-7,100<br>8,500,000 | 47,000<br>-13,000<br>6,007,000 | 53,200<br>0-9,999,999        |
| <i>Covariates</i>                                                       |                                |                                |                               |                                |                              |
| Female (percentage)                                                     | 52.06                          | 53.24                          | 46.14                         | 55.29                          | 52.55                        |
| Rural residence in adolescence (percentage)                             | 55.64                          | 34.30                          | 53.30                         | 54.31                          | 55.53                        |
| Number of siblings                                                      | 2.98<br>(2.23)                 | 3.02<br>(2.31)                 | 2.97<br>(2.28)                | 2.92<br>(2.31)                 | 2.96<br>(2.32)               |
| Did not live with both parents most of the time until 1957 (percentage) | 9.17                           | 9.59                           | 11.72                         | 10.69                          | 9.96                         |
| <i>N</i> <sup>b</sup>                                                   | 3,012                          | 1,790                          | 2,334                         | 1,948                          | 1,233                        |

*Note.* All values reported on their original metrics (i.e., prior to the creation of indices, skew correction, or standardizing).

<sup>a</sup> Median and range reported due to skew. A negative value indicates debt.

<sup>b</sup> Sample size varies for specific measures. For example, adult SES measures in the “attrited before age 65” group pertain only to participants who were still participating at age 53.
